# Supplementary material
Source: Elsevier journal article supplement (https://www.sciencedirect.com/science/article/pii/S0014256516300376)
Supplement: mmc1 [file S0014256516300376:mmc1.pdf]

## ANEXO I

### FORMULARIO DE LA ENCUESTA SOBRE INTERCONSULTA REMITIDA MEDIANTE CORREO ELECTRÓNICO

#### “Asistencia Compartida e Interconsultas”

#### ENCUESTA SOBRE LA ACTIVIDAD DE INTERCONSULTAS

(marque en rojo lo que proceda)

Nombre del hospital

Nombre Jefe del Servicio

#### Plantilla

Nº Jefe de servicio.....

Nº Jefes de Sección.....

Nº Adjuntos.....

Nº Residentes.....

#### Actividad

Nº Camas.....

Consultas

##### General

Si

No

##### Monográficas

Riesgo Cardiovascular

Si

No

Infecciosas-VIH

Si

No

Insuficiencia Cardíaca

Si

No

Síndrome Metabólico

Si

No

Enfermedad Tromboembólica

Si

No

Coordinación con Primaria

Si

No

Otras (especificar)

**Unidades Monográficas**

Hospitalización Domiciliaria

Si

No

Cuidados Paliativos

Si

No

Corta Estancia

Si

No

Infecciosas-VIH

Si

No

Coordinación con Primaria

Si

No

Otras (especificar)

Interconsultas

Si

No

### Actividad de Interconsultas

¿Tienen en su cartera de servicios alguna unidad dedicada a asistencia compartida (M. Consultiva, M. Perioperatoria) o recursos dedicados a ella?

Si

No

¿Desde cuándo (especifique año)?

19...

20....

Respecto al tiempo dedicado a esta actividad por miembros de la plantilla de MI:

Se realiza de forma monográfica (es decir los médicos que realizan la actividad sólo se dedican a eso)

Si

No

Se realiza a tiempo completo

Si

No

Se realiza a tiempo parcial

Si

No

Se realiza de forma rotatoria (la responsabilidad recae de forma sucesiva sobre diferentes miembros de la plantilla)

Si

No

En caso afirmativo, la periodicidad de la rotación es de:

Cada.....semanas

Cada.....meses

Diaria (el que entra de guardia)

Otras (describir)

Respecto al número de médicos que la realizan:

Uno

Dos

Tres

Especifique cuántos si son más o si incluye residentes

**Sobre la organización de la actividad de interconsultas y sólo en el caso de que su organización sea grande**

Existe una actividad programada para determinados procesos o servicios

- ☐ Servicio
  - ☐ Proceso

Tienen algún acuerdo firmado con algún servicio en relación con la actividad consultiva (Algún proceso concreto, un servicio entero, etc...)

Si

No

Si su hospital tiene actividad docente, ¿rotan los residentes por la actividad de interconsultas?

Si de forma obligatoria

Si de forma voluntaria

No

Otras opciones

No tenemos residentes

¿Existe un registro de la actividad de interconsulta que realizan?

Si, desde que comenzamos nuestra actividad

Si, desde hace..... meses

No

Otras

¿Estaría dispuesto a registrar su actividad “on line” para participar en un registro nacional colaborativo con el: Grupo de Trabajo de **“Asistencia Compartida e Interconsultas” de la SEMI (Sociedad Española de Medicina Interna)**

Si

No

Depende

**Sobre la actividad de Interconsulta que realizan en su Servicio:**

El número de interconsultas nuevas que atendemos cada día es de:

Más de 5

Entre 3 y 5

Entre 1 y 3

Menos de 1

No registramos la actividad y no disponemos de ese dato

El servicio más demandante de interconsultas en su caso es:

Traumatología

Cirugía general

Psiquiatría

Otro (especificar)

La estancia media (días que tardan en concluir una interconsulta) es en su caso:

Más de 10 días

Entre 10 y 7 días

Entre 7 y 5 días

Entre 5 y 3 días

Menos de 3 días

No registramos la actividad y no disponemos de ese dato

El tiempo medio de respuesta de la interconsulta (tiempo transcurrido desde la solicitud hasta la respuesta a la interconsulta) es en su caso:

Más de 2 días

Entre 2 y 1 día

En las 24 horas siguientes

En el día

No registramos la actividad y no disponemos de ese dato

**Sobre algunos conceptos de interconsulta:**

Considera y contabiliza como una interconsulta nueva:

Cada vez que va a ver un paciente cada día, independientemente de que ya lo haya visto el día anterior.

Si

No

Sólo los pacientes que ve por primera vez, no el seguimiento de pacientes que ya conoce.

Si

No

Pacientes ya conocidos que le consultan por un problema diferente por el que le consultaron en otra ocasión o que ingresan de nuevo.

Si

No

**Cuando realiza una interconsulta para otro servicio:**

Su servicio, ¿tiene algún protocolo escrito acerca de cómo realizar una interconsulta?

Si

No

En caso afirmativo, ese protocolo define:

Quién prescribe el tratamiento

Si

No

Quién solicita las complementarias

Si

No

Si se debe emitir algún informe al finalizar la atención

Si

No

Qué debe recogerse en la historia clínica

Si

No

En caso negativo, el comportamiento general de su Servicio, o el de su Unidad monográfica si la hubiere es:

Realizar por escrito una historia clínica, exploración, diagnóstico y pauta un tratamiento

Si

No

Sólo escribir un comentario con la resolución del problema por el que me consultan

Si

No

Plantear unas pruebas analíticas y unos estudios diagnósticos a los especialistas que solicitaron la interconsulta pero no los solicita ni los gestiona directamente

Si

No

Sugerir un tratamiento a los especialistas que solicitaron la interconsulta pero no pautarlo directamente

Si

No

Realizar el seguimiento del paciente con la periodicidad que considera necesaria sin necesidad de una nueva petición de interconsulta

Si

No

A la conclusión de la interconsulta, cuando va a dejar de visitar al paciente:

Siempre redacto un informe

Nunca redacto un informe

Redacto un informe si la evolución ha sido compleja o el tratamiento del paciente lo requiere

De redactar un informe, ¿dónde lo incorpora?

Como anexo en el informe de alta del servicio responsable del paciente

Como informe independiente

Otro formato (especificar)

Sobre la organización de la actividad de interconsultas y sólo en el caso de que su organización sea grande:

Mantiene una actividad estable con internistas asignados en algún servicio de su hospital

Si

No

En caso afirmativo realiza este tipo de actividad en los servicios de:

Traumatología

Si

No

Cirugía General

Si

No

Otros (especificar)

Sólo realiza interconsultas a demanda, es decir, para los servicios y especialistas que le envían una solicitud de atención

Si

No

¿Tiene organizada algún tipo de consulta preoperatoria?

Si

No

¿Tiene organizada algún tipo de consulta post-hospitalización?

Si

No

¿Cómo se comunica con los especialistas (cabén más de una)?:

Busca

Recibe los volantes en secretaría

Acceso telefónico

e-mail

Otras (especificar)

Escriba cualquier comentario que desee (TEXTO LIBRE):
